# Supplementary material
Source: publisher figshare collection journal article supplement (https://sage.figshare.com/ndownloader/files/17905178)
Supplement: Supplementary file 1 [file 17905178]

Supplemental Table 1

*Weighted Descriptive Statistics of Time-varying Variables at Respondents' (n = 2195) Final Observation*

|                                      | Mean/% | SE   | Min | Max | Missing (%) |
|--------------------------------------|--------|------|-----|-----|-------------|
| Likelihood of Divorce                |        |      |     |     | 0.05        |
| No Chance                            | 43     |      |     |     |             |
| Some Chance                          | 45     |      |     |     |             |
| About 50-50                          | 10     |      |     |     |             |
| Pretty Likely/It Will Happen         | 2      |      |     |     |             |
| Likelihood of Marriage               |        |      |     |     | 0.1         |
| No Chance/Some Chance                | 10     |      |     |     |             |
| About 50-50                          | 18     |      |     |     |             |
| Pretty Likely                        | 31     |      |     |     |             |
| It Will Happen                       | 40     |      |     |     |             |
| <u>Relationship Experiences</u>      |        |      |     |     |             |
| Relationship Status                  |        |      |     |     | 0.1         |
| Single                               | 42     |      |     |     |             |
| Dating                               | 32     |      |     |     |             |
| Cohabiting                           | 26     |      |     |     |             |
| Have a Child                         | 20     |      |     |     | 0.1         |
| Parental Marital Status              |        |      |     |     | 21          |
| Never Married                        | 7      |      |     |     |             |
| In First Marriage                    | 55     |      |     |     |             |
| Ended First Marriage                 | 18     |      |     |     |             |
| Second or Higher Order               | 20     |      |     |     |             |
| <u>Socioeconomic Characteristics</u> |        |      |     |     |             |
| Education Completed                  |        |      |     |     | 6           |
| Less than High School                | 6      |      |     |     |             |
| High School or GED                   | 70     |      |     |     |             |
| College+                             | 25     |      |     |     |             |
| In College                           | 27     |      |     |     | 0.3         |
| Employment                           |        |      |     |     | 7           |
| Unemployed                           | 7      |      |     |     |             |
| Part Time                            | 39     |      |     |     |             |
| Full Time                            | 54     |      |     |     |             |
| Job in Career Plan                   | 42     |      |     |     | 3           |
| Savings                              |        |      |     |     | 2           |
| No Savings                           | 17     |      |     |     |             |
| Up to \$1K                           | 37     |      |     |     |             |
| \$1K+                                | 47     |      |     |     |             |
| Student Loans                        | 42     |      |     |     | 0.1         |
| <u>Context and Maturity</u>          |        |      |     |     |             |
| Responsible                          | 4.35   | 0.03 | 1   | 5   | 1           |
| Residence with Parents               |        |      |     |     | 1           |
| Parents All Year                     | 30     |      |     |     |             |

|                                       |       |      |   |    |     |
|---------------------------------------|-------|------|---|----|-----|
| Parents Part Year                     | 14    |      |   |    |     |
| Not with Parents                      | 56    |      |   |    |     |
| Religious Importance                  |       |      |   |    | 0.3 |
| Not Important                         | 22    |      |   |    |     |
| Somewhat Important                    | 47    |      |   |    |     |
| Very Important                        | 30    |      |   |    |     |
| Arrested                              | 21    |      |   |    | 0.2 |
| Friends Married                       | 2.33  | 0.03 | 1 | 5  | 0.3 |
| <u>Mental and Emotional Wellbeing</u> |       |      |   |    |     |
| Worry                                 | 3.48  | 0.04 | 1 | 7  |     |
| Psychological Distress                | 5.05  | 0.11 | 0 | 24 | 0.1 |
| Wellbeing                             | 13.55 | 0.70 | 4 | 18 | 1   |

---
